# Supplementary material
Source: PubMed Central journal article supplement (PMC3910579)
Supplement: 1314848111_pnas.201314848SI.pdf [file 1314848111_pnas.201314848SI.pdf]

# Supporting Information

Kumar et al. 10.1073/pnas.1314848111

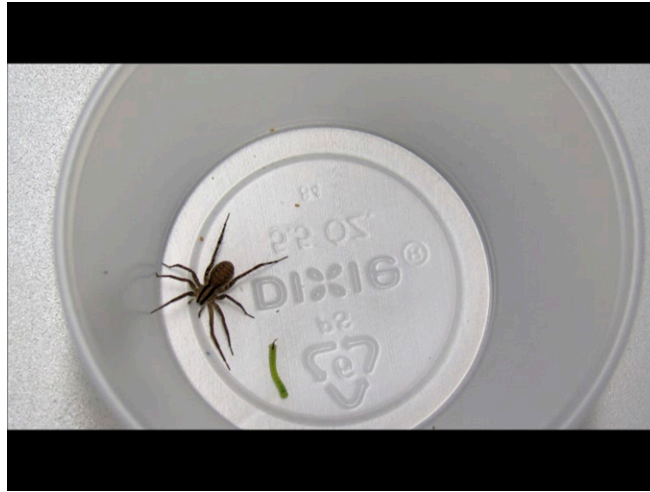

**Movie S1.** Spider's attack behavior when presented with empty vector (EV)-fed *Manduca sexta* larvae. A spider in the assay container (50 cc) was offered a *M. sexta* larvae (second instar) that had fed on EV plants since hatching. Video shows how the spider is rapidly repelled by the larvae, which had fed on nicotine-replete EV plants after a first contact.

[Movie S1](#)

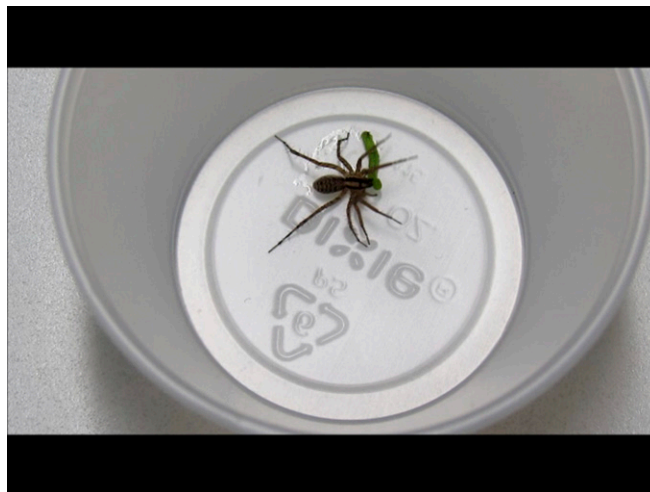

**Movie S2.** Spider's attack behavior when presented with inverted repeat (ir)CYP-fed *M. sexta* larvae. A spider in the assay container (50 cc) was offered *M. sexta* larvae (second instar) that had fed since hatching on irCYP plants. Video shows how the spider readily attacks and consumes larvae, which had fed on the nicotine-replete irCYP plants, which in turn had silenced their midgut-expressed *MsCYP6B46* transcripts.

[Movie S2](#)
